1 ***Vibrio cholerae* El Tor strains linked to global cholera are homogeneous by pulsed-field gel**  
2 **electrophoresis**

3

4 Fatema-Tuz Johura<sup>1¶</sup>, Sahitya Ranjan Biswas<sup>1¶</sup>, Shah M Rashed<sup>1</sup>, Mohammad Tarequl Islam<sup>1</sup>,  
5 Saiful Islam<sup>1</sup>, Marzia Sultana<sup>1</sup>, Anwar Huq<sup>2</sup>, Nicholas R Thomson<sup>3</sup>, Rita R. Colwell<sup>2,4,5</sup>, Haruo  
6 Watanabe<sup>6</sup>, and Munirul Alam<sup>1\*</sup>

7

8 <sup>1</sup>icddr, b, Formerly International Centre for Diarrhoeal Disease Research, Bangladesh, Dhaka,  
9 Bangladesh,

10 <sup>2</sup>Maryland Pathogen Research Institute, University of Maryland, College Park, Maryland, USA

11 <sup>3</sup>Wellcome Trust Sanger Institute, Wellcome Trust Genome Campus, Hinxton, Cambridge, CB10

12 1SA, UK

13 <sup>4</sup>Johns Hopkins Bloomberg School of Public Health, Baltimore, MD, USA

14 <sup>5</sup>Center for Bioinformatics and Computational Biology, University of Maryland Institute of

15 Advanced Computer Studies, University of Maryland, College Park, Maryland 20742, USA

16 <sup>6</sup>National Institutes of Infectious Diseases (NIID), Tokyo, Japan

17

18 ¶ These authors contributed equally to this work

19 **\*Corresponding author**

20 Email: [munirul@icddr.org](mailto:munirul@icddr.org) (MA)

21

22

23

24

25

## 26 **Abstract**

27 *Vibrio cholerae* O1 El Tor, causative agent of the ongoing seventh cholera pandemic, is native to  
28 the aquatic environment of the Ganges Delta, Bay of Bengal (GDBB). Recent studies traced  
29 pandemic strains to the GDBB and proposed global spread of cholera had occurred via  
30 intercontinental transmission. In the research presented here, *NotI*-digested genomic DNA  
31 extracted from *V. cholerae* O1 clinical and environmental strains isolated in Bangladesh during  
32 2004 – 2014 was analyzed by pulsed-field gel electrophoresis (PFGE). Results of cluster analysis  
33 showed 94.67% of the *V. cholerae* isolates belonged to clade A and included the majority of  
34 clinical isolates of spatio-temporal origin and representing different cholera endemic foci. The rest  
35 of the strains were estuarine, all environmental isolates from Mathbaria, Bangladesh, and occurred  
36 as singletons, clustered in clades B and C, or in the small clades D and E. Cluster analysis of the  
37 Bangladeshi strains and including 157 El Tor strains from thirteen countries in Asia, Africa, and  
38 the Americas revealed 85% of the total set of isolates belonged to clade A, indicating all were  
39 related, yet did not form an homogeneous cluster. Overall, 15% of the global strains comprised  
40 multiple small clades or segregated as singletons. Three sub-clades could be discerned within the  
41 major clade A, reflecting distinct lineages of *V. cholerae* El Tor associated with cholera in Asia,  
42 Africa, and the Americas. The presence in Asia and the Americas of non-pandemic *V. cholerae*  
43 El Tor populations differing by PFGE and from strains associated with cholera globally suggests  
44 different ecotypes are resident in distant geographies.

45

46

## 47 **Author Summary(words 154)**

48 Cholera is a major health threat, especially in the Ganges Delta, Bay of Bengal (GDBB). *Vibrio*  
49 *cholerae*, causative agent of cholera, is native to the GDBB aquatic environment. Recent  
50 genomic studies suggest GDBB is the cholera hotspot where the disease spreads globally via  
51 human activity. Pulsed-field gel electrophoresis (PFGE) of *NotI*-digested genomic DNA from *V.*  
52 *cholerae* El Tor endemic cholera strains was done, including Bangladesh aquatic environment  
53 and clinical strains from distant geographical regions representing three cholera-prone  
54 continents. Results showed the majority of pandemic strains belonged to a major cluster,  
55 suggesting clonal relatedness. Ecotypes were detected, indicating geographically specific  
56 lineages. It is concluded that epidemic strains in Bangladesh and thirteen countries of Asia,  
57 Africa, and the Americas are geographically adapted, with independent evolution of the  
58 bacterium in respective geographical regions.

59

## 60 **Introduction**

61 Cholera, with seven pandemics reported to date, represents a significant chapter in human history  
62 and infectious disease. The acute form of diarrhea caused by *Vibrio cholerae* is related to  
63 production of a toxin that triggers the characteristic water loss and severe dehydration of cholera  
64 [1]. Cholera remains a threat in many countries, notably where access to safe drinking water is  
65 limited. Bangladesh is a developing country where cholera is endemic, with two annual peaks in  
66 some regions of the country [2]. The estimated global burden of cholera is 2.86 million cases and  
67 95,000 deaths. In Bangladesh alone, approximately 100,000 million new cases are diagnosed each  
68 year, resulting in 4,500 deaths [3]. *V. cholerae* strains are widely distributed globally in many

69 coastal, estuarine, and brackish water ecosystems as free-living bacterial cells or associated with  
70 zooplankton, namely copepods [4-6]. Brackish waters in coastal areas support bacterial  
71 populations, with environmental stimuli favorable for bacterial growth prompting cholera  
72 outbreaks [5].

73 *V. cholerae* O1 is classified into two biotypes, classical and El Tor, based on genetic differences.  
74 The seventh and ongoing pandemic is attributed to the El Tor biotype of *V. cholerae* O1 [8].  
75 Beginning in 1961 in Indonesia, the seventh pandemic of cholera included Africa in 1970, Latin  
76 America in 1991, and more recently Haiti and Yemen [9-12]. After the initial cases occurred, most  
77 of these regions continued to suffer episodes of cholera. There is debate whether the recurrent  
78 outbreaks of cholera in Africa and the Americas are caused by distinct intercontinental introduction  
79 or resurgence of indigenous clones. A few recent investigations investigated the genetic  
80 homogeneity of the 7<sup>th</sup> pandemic strains and connected both origin and recurrent transmission to  
81 a single source, the Bay of Bengal [13]. However, the co-existence of several local lineages, along  
82 with the pandemic clones and their regional evolution, has painted a very complex picture of  
83 bacterial population dynamics, especially in and out of endemic settings [14]. Thus, monitoring  
84 pandemic and local strains became a priority for some investigators, as a means of developing an  
85 effective public health model and strategy for controlling the current pandemic and preventing  
86 future pandemics of cholera.

87 Whole genome typing methods, e.g. multi-locus sequence typing (MLST), multi-locus variant  
88 analysis (MLVA), ribotyping, random amplification of polymorphic DNA (RAPD), and pulsed  
89 field gel electrophoresis (PFGE), have been employed to differentiate isolates and monitor  
90 transmission routes [15-18]. PFGE is a DNA fingerprinting method that can discriminate bacterial  
91 strains. Before introduction of whole genome sequencing (WGS), epidemiological studies of

92 cholera relied on PFGE [18]. An earlier study highlighted the value of PFGE in revealing clonality  
93 among isolates from two well-defined cholera outbreaks in Malaysia [19]. Intrinsic limitations  
94 include restriction digestion being skewed by mobile elements, hence restricted value for  
95 phylogeny. Although PFGE does not provide as high resolution as WGS, its stability and  
96 reproducibility allow rudimentary, yet comprehensive, analysis of ancestry [18].

97 In the study reported here, the objective was to understand both regional diversity and global  
98 distribution of *V. cholerae* El Tor representing seventh pandemic lineage. Therefore, strains in  
99 Bangladesh isolated over a decade were compared with strains from thirteen countries across Asia,  
100 Africa, and the Americas. Both environmental and clinical isolates were included since the local  
101 environment can influence strains, persisting and becoming epidemic, as well as providing access  
102 to autochthonous strains of *V. cholerae* El Tor.

103

## 104 **Results**

105 The *NotI* restriction enzyme digested genomic DNA of the test strains into 20 to 23 fragments  
106 and the molecular sizes of the DNA fragments ranged from 20 to 350 kb. Digested genomic  
107 DNAs of different spatiotemporal origin and resulting different biotype categorizations were  
108 subjected to PFGE. The resulting band patterns were analyzed by Dice similarity coefficient and  
109 UPGMA clustering methods to determine genetic and ancestral relatedness.

### 110 **Local diversity and distribution of the Bangladesh isolates**

111 In a dendrogram obtained by UPGMA analysis of DNA band patterns, the Bangladesh isolates  
112 comprised five different clades, A, B, C, D, and E (Figs 1 and 2). Of the 169 isolates, 160

113 clustered in clade A, suggesting a single lineage. A single clinical isolate, collected in 1991 from  
114 Matlab, clustered with clade A, a clade of predominantly clinical isolates from endemic sites,  
115 including estuary villages in Bangladesh. While a few environmental isolates were found to  
116 cluster in clade A, other environmental isolates collected in 2012 from Mathbaria exhibited  
117 different PFGE patterns and did not join clade A (S1 Fig). Isolates with different pulsotypes  
118 included three singletons and a small clade [B(1); C(1); D(6); E(1)] (Fig 1). Singletons in clades  
119 B, C, and E were isolates from the aquatic environment. It should be noted that clade D included  
120 isolates of both clinical and environmental origin. All clade D isolates possessed *rstR* classical  
121 biotype, a characteristic limited to this clade (S1 Table). Most of the Chhatak isolates (27 of 31)  
122 had the same pulsotype closely related to *V. cholerae* isolates from Dhaka and Mathbaria (S1  
123 Fig).

## 124 **Global distribution of clones**

125 When the PFGE banding patterns of *V. cholerae* O1 isolates from Bangladesh were compared  
126 with those of 157 isolates collected from thirteen countries across Asia, Africa, and Latin  
127 America, the isolates could be differentiated into 16 clades; A through P (Fig 3). Clade A isolates  
128 from Bangladesh clustered with 133 of the 293 strains, comprising a majority of isolates from 14  
129 countries and three continents (Figs 3 and 4). Hence, a majority of the *V. cholerae* El Tor isolates  
130 from different geographical regions revealed a similar PFGE pattern and fell into a major clade,  
131 with country-specific sub-clustering, i.e., subclades within the major clade A. The sub clades of  
132 A included *V. cholerae* El Tor strains from Vietnam (n=15), Zambia (n=9), Haiti (n=3), India  
133 (n=2), Pakistan (n=3), Sri Lanka (n=1), and most of the strains from Zimbabwe (8 of 12) and  
134 Nepal (27 of 39), Fig 4. Three subclades within clade A reflected a broader spatial distinction  
135 and 202 of 273 (74%) Asian and African isolates comprising subclade Ia and 60 of 273 (22%) in

136 subclade Ib. Latin American isolates (16 of 21) in clade A comprised subclade II. Interestingly,  
137 the Latin American isolates were predominantly *V. cholerae* prototype ET (S1 Table). A few  
138 isolates from Bangladesh, Thailand and one from Zimbabwe fell into sub-clade II (Fig 4).

139 Subclade II *V. cholerae* El Tor strains from Mexico, isolated during 1992 to 1999, were located  
140 in a branch, separating them from isolates collected between 2004 and 2008. Three *V. cholerae*  
141 El Tor strains isolated during the 2010 Haitian cholera outbreak comprised subclade Ia, with  
142 Asian and African strains. Two *V. cholerae* O1 EL Tor strains isolated in Bangladesh during  
143 2011 joined with *V. cholerae* ET strains from Peru, Brazil, and Mexico, based on PFGE, Figs 3  
144 and 4.

145 Aside from clade A, the clade E isolates from Bangladesh shared PFGE pattern with an ET  
146 isolate from Peru and two from Zimbabwe (Fig 5). As with the Bangladesh isolates, locally  
147 restricted diversity was observed for isolates from Mexico, reflected by 11 distinct groups in  
148 addition to clade A. Groups F-P comprised isolates from Mexico, notably those collected during  
149 2000 to 2004 (Fig 4).

## 150 **Discussion**

151 In many epidemiological studies, pulsed-field gel electrophoresis (PFGE) is used to discern  
152 source attributes of strains from different outbreaks. With the advent of whole genome  
153 sequencing and comparative genomics, the once gold standard PFGE is less appreciated as a  
154 DNA fingerprinting tool of epidemiological implication. In the study reported here, PFGE  
155 analysis of *V. cholerae* O1 El Tor isolates associated with endemic cholera in Bangladesh and  
156 thirteen countries of Asia, Africa and the America showed the strains to be related genetically,  
157 but not homogenous globally. A majority of the strains comprised a major clade, with divergence

158 noted for non-pandemic and environmental isolates from the Bay of Bengal, Bangladesh and  
159 strains from the Gulf of Mexico. According to a recent WGS-based study of a restricted subset of  
160 *V. cholerae* clones, those strains were responsible for epidemic cholera worldwide [20-21]. In  
161 this study, PFGE was used to analyze clinical strains of *V. cholerae* from different geographical  
162 locations and with different genetic and phenotypic characteristics.

163 *V. cholerae* El Tor biotype has dominated clinically over the classical biotype since 1961, the  
164 latter having last been isolated in Bangladesh in 1992 [22-23]. Observed co-existence of the two  
165 biotypes for such a long time likely resulted in the hybrid characteristics of El Tor with classical  
166 biotype attributes, as observed in Bangladesh [24-25]. In this study, the majority of *V. cholerae*  
167 El Tor isolates from clinical and environment sources comprised a major clade, suggesting  
168 similarity of strains from both sources and associated with epidemics in Bangladesh. Some of the  
169 environmental strains did not fall into clade A, suggesting those to be genetically divergent  
170 pulsotypes present in a diverse population existing in the environment. Environmental *V.*  
171 *cholerae* ET in our study, with a few exceptions, were similar to clinical isolates in clade A.  
172 Previous epidemiological surveillance conducted in the Bay of Bengal estuary has shown  
173 pathogenic strains can be detected in aquatic habitats, either in the culturable or non-culturable  
174 state, depending on the season [26].

175 A major genome-based study postulated the pandemic *V. cholerae* strain originated in Bay of  
176 Bengal villages of Asia and transmitted world-wide in three different waves [13]. It was  
177 concluded that *V. cholerae* O1 ET has the ability to travel inter-continently and adapt to its  
178 place of introduction by sharing niches with existing microflora in coastal and estuarine regions,  
179 including the Gulf coast of Mexico [27]. Notwithstanding the fact that outbreaks occurring after  
180 introduction can be attributed to *V. cholerae* and the pathogen can be introduced repeatedly or



181 adapt locally, either is possible. Whole genome sequencing based studies linked epidemics in  
182 Africa and the Americas to multiple introduction events, rather than preexisting pathotypes [8-9].  
183 The PFGE banding patterns observed for the majority of *V. cholerae* O1 included in this study  
184 support an intercontinental transmission hypothesis [28], but only in a global context. The  
185 observation of country-based subclades indicates an independent evolution of the pandemic  
186 pathogen. Genetic changes were reported among initially homogeneous *V. cholerae* O1 ET  
187 initiating the Haitian cholera epidemic in 2010 [28]. In this context, *V. cholerae* ET strains  
188 associated with the Haitian cholera in 2010 were observed to be closely related to isolates from  
189 other Southeast Asian countries [28].

190 While cholera had not been reported in the Americas for more than a century before 1991, the  
191 observed presence of *V. cholerae* classical biotype and diverse *V. cholerae* ET lineages in  
192 Mexico was uncharacteristic for a region outside of Asia or Africa, suggesting a capricious  
193 nature of the bacterium [29]. Most *V. cholerae* ET isolates in Mexico that diverged separately  
194 from the pandemic clones lacked CTX phage [30] and were not related to the non-toxicogenic  
195 isolates from Thailand [31]. Previously, we had shown that CTX phage negative isolates  
196 dominated clinical cases in Mexico during 2001-2004 [30] and studies posited the isolates to be  
197 ancestors of the *V. cholerae* responsible for the sixth and seventh pandemics [29].

198 While the observed relatedness of PFGE patterns of *V. cholerae* El Tor associated with cholera  
199 epidemics in Asia, Africa, and the Americas supports the potential for global transmission of the  
200 pandemic pathogen [13], the divergence of strains and their region-specific signatures also  
201 support independent evolution of *V. cholerae* locally. Clearly the overall picture is complex and  
202 warrants regular monitoring to assist designing effective intervention models to counter future

203 pandemics. In any case PFGE data, as presented in this study show this technology can be  
204 effective for analysis and source-tracking of cholera outbreaks.

205

## 206 **Materials and Methods**

### 207 **Geographical profile of isolates**

208 A total of 169 strains were collected between 1991 and 2014 from four endemic sites in  
209 Bangladesh: Mathbaria (n=99); Dhaka (n=38); Chhatak (n=31); and Matlab (n=1). Of these, 119  
210 and 50 were of clinical and environmental origin, respectively. To investigate phylogenetic  
211 relationships, an additional 157 strains (150 clinical and 7 environmental) were collected from 13  
212 countries across Asia, Africa, and Latin America [Nepal 39, Thailand 32, Vietnam 15, Pakistan  
213 3, India 2, Sri Lanka 1, Zambia 9, Zimbabwe 12, Mozambique 2, Mexico 34, Brazil 2, Peru 3,  
214 and Haiti 3] (Table 1). All strains were confirmed as *V. cholerae* O1 El Tor biotype by culture,  
215 and serotype and biotype specific genotype. Detailed information for the isolates is provided in  
216 Tables 1 and 2, and S1 Table.

217 **Table 1. Geographic source of *V. cholerae* El tor isolates included in this study.**

| Country    | No. of strains | Source        |          | Serotype |       |
|------------|----------------|---------------|----------|----------|-------|
|            |                | Environmental | Clinical | Inaba    | Ogawa |
| Bangladesh | 169            | 50            | 119      | 33       | 136   |
| Sri Lanka  | 1              | -             | 1        | -        | 1     |
| Pakistan   | 3              | -             | 3        | 1        | 2     |
| India      | 2              | -             | 2        | 2        | -     |
| Nepal      | 39             | 6             | 33       | -        | 39    |
| Vietnam    | 15             | -             | 15       | -        | 15    |
| Thailand   | 32             | 1             | 31       | 17       | 15    |

|            |    |   |    |    |    |
|------------|----|---|----|----|----|
| Zambia     | 9  | - | 9  | -  | 9  |
| Zimbabwe   | 12 | - | 12 | 4  | 8  |
| Mozambique | 2  | - | 2  | -  | 2  |
| Mexico     | 34 | - | 34 | 17 | 17 |
| Brazil     | 2  | - | 2  | 2  | -  |
| Haiti      | 3  | - | 3  | -  | 3  |
| Peru       | 3  | - | 3  | -  | 3  |
| n= 326     |    |   |    |    |    |

218

219 **Table 2. *V. cholerae* genotypes based on *ctxB*, *rstR*, and *tcpA* genes.**

220

| Countries  | <i>ctxB</i> |           |          | <i>rstR</i> |           |      |          | <i>tcpA</i> |           |      |          |
|------------|-------------|-----------|----------|-------------|-----------|------|----------|-------------|-----------|------|----------|
|            | Classical   | EI<br>Tor | Negative | Classical   | EI<br>Tor | Both | Negative | Classical   | EI<br>Tor | Both | Negative |
| Bangladesh | 167         | 2         | -        | 7           | 162       | -    | -        | -           | 169       | -    | -        |
| Nepal      | 39          | -         | -        | -           | 39        | -    | -        | -           | 39        | -    | -        |
| Thailand   | 27          | -         | 5        | 9           | 18        | -    | 5        | -           | 32        | -    | -        |
| India      | 2           | -         | -        | -           | 2         | -    | -        | -           | 2         | -    | -        |
| Pakistan   | 3           | -         | -        | -           | 3         | -    | -        | -           | 3         | -    | -        |
| Sri Lanka  | 1           | -         | -        | -           | 1         | -    | -        | -           | 1         | -    | -        |
| Vietnam    | 15          | -         | -        | -           | 15        | -    | -        | -           | 15        | -    | -        |
| Zambia     | 9           | -         | -        | -           | 9         | -    | -        | -           | 9         | -    | -        |
| Mozambique | 2           | -         | -        | 2           | -         | -    | -        | -           | 2         | -    | -        |
| Zimbabwe   | 12          | -         | -        | -           | 12        | -    | -        | -           | 12        | -    | -        |
| Mexico     | 5           | 16        | 13       | -           | 16        | 5    | 13       | 1           | 26        | 4    | 3        |
| Brazil     | -           | 2         | -        | -           | 2         | -    | -        | -           | 2         | -    | -        |
| Peru       | -           | 3         | -        | -           | 3         | -    | -        | -           | 3         | -    | -        |
| Haiti      | 3           | -         | -        | -           | 3         | -    | -        | -           | 3         | -    | -        |

## 221 **Pulsed-field gel electrophoresis (PFGE)**

222 Whole agarose-embedded genomic DNA was prepared from each isolate. PFGE was carried out  
223 using a contour-clamped homogeneous electrical field (CHEF-DRII) apparatus (Bio-Rad),  
224 following procedures described previously [32]. Conditions for separation were as follows: 2 to  
225 10s for 13 h, followed by 20 to 25 s for 6 h. An electrical field of 6 V/cm was applied at an  
226 included field angle of 120°. Genomic DNA of the test strains was digested by *NotI* restriction  
227 enzyme (Gibco-BRL, Gaithersburg, MD) and *Salmonella enterica* serovar Braenderup was  
228 digested using *XbaI*, with fragments employed as molecular size markers. Restriction fragments  
229 were separated in 1% pulsed-field-certified agarose in 0.5X TBE (Tris-borate-EDTA) buffer.  
230 Post-electrophoresis gel-treatment included gel staining and de-staining. DNA was visualized  
231 using a UV transilluminator and images were digitized using a one-dimensional gel  
232 documentation system (Bio-Rad).

## 233 **Image analysis**

234 The fingerprint pattern in each gel was analyzed using a computer software package, Bionumeric  
235 (Applied Maths, Belgium). After background subtraction and gel normalization, the fingerprint  
236 patterns were typed according to banding similarity and dissimilarity, using the Dice similarity  
237 coefficient and unweighted-pair group method employing average linkage (UPGMA) clustering,  
238 as recommended by the manufacturer. The results were graphically represented as dendrograms.

## 239 **Institutional approval**

240 All the experimental protocols were reviewed and approved by the Research Review Committee  
241 (RRC), and Ethics Review Committee(ERC) of the International Centre for Diarrhoeal Disease

242 Research, Bangladesh (research grant: 1R01A139129-01 and protocol: PR-14017). All methods  
243 were conducted in accordance with the guidelines of the RRC and ERC.

244

## 245 **Conflict of interest**

246 The research was conducted in the absence of any commercial or financial relationships that  
247 could be construed as a potential conflict of interest.

## 248 **Acknowledgement**

249

250 This research was partially supported by Japan Food Hygiene Association through National  
251 Institutes of Infectious Diseases (NIID), Tokyo, Japan, and the NIH (USA) research grant  
252 1R01A139129-01 under collaborative agreements between the Johns Hopkins Bloomberg  
253 School of Public Health, icddr,b, and the University of Maryland. Authors gratefully  
254 acknowledge Richard Bradley Sack, Johns Hopkins Bloomberg School of Public Health, USA,  
255 and K-M Kam and Cindy KY Luey, Public Health Laboratory Center, Hong Kong, and the  
256 icddr,b hospital and laboratory staff for their support. icddr,b gratefully acknowledges the  
257 following donors who provide unrestricted support: Governments of Bangladesh, Canada,  
258 Sweden and the UK.

## 259 **Author Contributions**

260 Conceptualization and study design: FTJ, MA

261 Data curation: FTJ, SRB

262 Formal analysis: FTJ, SRB

263 Investigation: FTJ, SMR, MTI, SI, MS

264 Methodology: FTJ, SMR, MTI, SI, MA  
265 Supervision: MA  
266 Writing – original draft: FTJ, SRB  
267 Writing—review and editing: TA, AH, NRT, RRC, MA  
268 All authors contributed to the article and approved the submitted version

269

270

271

## 272 **References**

- 273 1. Harris J. F, Ryan, ET, and Calderwood, SB. Cholera. *Lancet*. 2012;379:2466-76.
- 274 2. Alam M, Islam A, Bhuiyan N, Rahim N, Hossain A, Khan GY, et al. Clonal transmission,  
275 dual peak, and off-season cholera in Bangladesh. *Infection ecology & epidemiology*. 2011  
276 Jan 1;1(1):7273.
- 277 3. Ali M, Nelson AR, Lopez AL, Sack DA. Updated global burden of cholera in endemic  
278 countries. *PLoS neglected tropical diseases*. 2015 Jun 4;9(6):e0003832.
- 279 4. Colwell RR, Huq A. Environmental Reservoir of *Vibrio cholerae* The Causative Agent of  
280 Cholera a. *Annals of the New York Academy of Sciences*. 1994 Dec;740(1):44-54.
- 281 5. Huq A, Sack RB, Nizam A, Longini IM, Nair GB, Ali A, et al. Critical factors influencing  
282 the occurrence of *Vibrio cholerae* in the environment of Bangladesh. *Applied and*  
283 *environmental microbiology*. 2005 Aug;71(8):4645-54.
- 284 6. Lutz C, Erken M, Noorian P, Sun S, McDougald D. Environmental reservoirs and  
285 mechanisms of persistence of *Vibrio cholerae*. *Frontiers in microbiology*. 2013 Dec 16;4:375.

- 286 7. Hu D, Liu B, Feng L, Ding P, Guo X, Wang M, et al. Origins of the current seventh cholera  
287 pandemic. *Proceedings of the National Academy of Sciences*. 2016 Nov 29;113(48):E7730-  
288 9.
- 289 8. Weill FX, Domman D, Njamkepo E, Tarr C, Rauzier J, Fawal N, et al. Genomic history of  
290 the seventh pandemic of cholera in Africa. *Science*. 2017 Nov 10;358(6364):785-9.
- 291 9. Domman D, Quilici ML, Dorman MJ, Njamkepo E, Mutreja A, Mather AE, et al. Integrated  
292 view of *Vibrio cholerae* in the Americas. *Science*. 2017 Nov 10;358(6364):789-93.
- 293 10. Eppinger M, Pearson T, Koenig SS, Pearson O, Hicks N, Agrawal S, et al. Genomic  
294 epidemiology of the Haitian cholera outbreak: a single introduction followed by rapid,  
295 extensive, and continued spread characterized the onset of the epidemic. *MBio*. 2014 Nov  
296 4;5(6):e01721-14.
- 297 11. Qadri F, Islam T, Clemens JD. Cholera in Yemen—an old foe rearing its ugly head. *New*  
298 *England Journal of Medicine*. 2017 Nov 23;377(21):2005-7.
- 299 12. Choi SY, Rashed SM, Hasan NA, Alam M, Islam T, Sadique A, et al. Phylogenetic diversity  
300 of *Vibrio cholerae* associated with endemic cholera in Mexico from 1991 to 2008. *MBio*.  
301 2016 Mar 15;7(2):e02160-15.
- 302 13. Mutreja A, Kim DW, Thomson NR, Connor TR, Lee JH, Kariuki S, et al. Evidence for  
303 several waves of global transmission in the seventh cholera pandemic. *Nature*. 2011  
304 Sep;477(7365):462-5.
- 305 14. Codeço CT. Endemic and epidemic dynamics of cholera: the role of the aquatic reservoir.  
306 *BMC Infectious diseases*. 2001 Dec;1(1):1-4.
- 307 15. Maiden MC, Bygraves JA, Feil E, Morelli G, Russell JE, Urwin R, et al. Multilocus sequence  
308 typing: a portable approach to the identification of clones within populations of pathogenic

- 309 microorganisms. Proceedings of the National Academy of Sciences. 1998 Mar  
310 17;95(6):3140-5.
- 311 16. Okada K, Roobthaisong A, Nakagawa I, Hamada S, Chantaroj S. Genotypic and  
312 PFGE/MLVA analyses of *Vibrio cholerae* O1: geographical spread and temporal changes  
313 during the 2007–2010 cholera outbreaks in Thailand. PLoS One. 2012 Jan 24;7(1):e30863.
- 314 17. Leal NC, Sobreira M, Leal-Balbino TC, de Almeida AM, da Silva MJ, Mello DM, et al.  
315 Evaluation of a RAPD-based typing scheme in a molecular epidemiology study of *Vibrio*  
316 *cholerae* O1, Brazil. Journal of applied microbiology. 2004 Mar;96(3):447-54.
- 317 18. Rahaman M, Islam T, Colwell RR, Alam M. Molecular tools in understanding the evolution  
318 of *Vibrio cholerae*. Frontiers in microbiology. 2015 Oct 6;6:1040.
- 319 19. Mahalingam S, Cheong YM, Kan S, Yassin RM, Vadivelu J, Pang T. Molecular  
320 epidemiologic analysis of *Vibrio cholerae* O1 isolates by pulsed-field gel electrophoresis.  
321 Journal of clinical microbiology. 1994 Dec;32(12):2975-9.
- 322 20. Lan R, Reeves PR. Pandemic spread of cholera: genetic diversity and relationships within the  
323 seventh pandemic clone of *Vibrio cholerae* determined by amplified fragment length  
324 polymorphism. Journal of Clinical Microbiology. 2002 Jan;40(1):172-81.
- 325 21. Moore S, Thomson N, Mutreja A, Piarroux R. Widespread epidemic cholera caused by a  
326 restricted subset of *Vibrio cholerae* clones. Clinical Microbiology and Infection. 2014 May  
327 1;20(5):373-9.
- 328 22. Kaper JB, Morris JG Jr, Levine MM. Cholera. Clin Microbiol Rev. 1995 Jan;8(1):48-86
- 329 23. Faruque SM, Abdul Alim AR, Rahman MM, Siddique AK, Sack RB, Albert MJ. Clonal  
330 relationships among classical *Vibrio cholerae* O1 strains isolated between 1961 and 1992 in  
331 Bangladesh. Journal of clinical microbiology. 1993 Sep;31(9):2513-6.



- 332 24. Nair GB, Faruque SM, Bhuiyan NA, Kamruzzaman M, Siddique AK, Sack DA. New  
333 variants of *Vibrio cholerae* O1 biotype El Tor with attributes of the classical biotype from  
334 hospitalized patients with acute diarrhea in Bangladesh. *Journal of clinical microbiology*.  
335 2002 Sep;40(9):3296-9.
- 336 25. Nair GB, Qadri F, Holmgren J, Svennerholm AM, Safa A, Bhuiyan NA, Ahmad QS, Faruque  
337 SM, Faruque AS, Takeda Y, Sack DA. Cholera due to altered El Tor strains of *Vibrio*  
338 *cholerae* O1 in Bangladesh. *Journal of clinical microbiology*. 2006 Nov;44(11):4211-3.
- 339 26. Alam M, Sultana M, Nair GB, Siddique AK, Hasan NA, Sack RB, et al. Viable but  
340 nonculturable *Vibrio cholerae* O1 in biofilms in the aquatic environment and their role in  
341 cholera transmission. *Proceedings of the National Academy of Sciences*. 2007 Nov  
342 6;104(45):17801-6.
- 343 27. Kaper JB, Bradford HB, Roberts NC, Falkow ST. Molecular epidemiology of *Vibrio*  
344 *cholerae* in the US Gulf Coast. *Journal of Clinical Microbiology*. 1982 Jul;16(1):129-34.
- 345 28. Chin CS, Sorenson J, Harris JB, Robins WP, Charles RC, Jean-Charles RR, et al. The origin  
346 of the Haitian cholera outbreak strain. *New England Journal of Medicine*. 2011 Jan  
347 6;364(1):33-42.
- 348 29. Boucher Y. Sustained local diversity of *Vibrio cholerae* O1 biotypes in a previously cholera-  
349 free country. *MBio*. 2016 May 3;7(3):e00570-16.
- 350 30. Alam M, Rashed SM, Mannan SB, Islam T, Lizarraga-Partida ML, Delgado G, et al.  
351 Occurrence in Mexico, 1998–2008, of *Vibrio cholerae* CTX+ El Tor carrying an additional  
352 truncated CTX prophage. *Proceedings of the National Academy of Sciences*. 2014 Jul  
353 8;111(27):9917-22.

- 354 31. Tapchaisri P, Na-Ubol M, Tiyasuttipan W, Chaiyaroj SC, Yamasaki S, Wongsaroj T, et al.  
355 Molecular typing of *Vibrio cholerae* O1 isolates from Thailand by pulsed-field gel  
356 electrophoresis. *Journal of health, population, and nutrition*. 2008 Mar;26(1):79.
- 357 32. Cameron DN, Khambaty FM, Wachsmuth IK, Tauxe RV, Barrett TJ. Molecular  
358 characterization of *Vibrio cholerae* O1 strains by pulsed-field gel electrophoresis. *Journal of*  
359 *clinical microbiology*. 1994 Jul;32(7):1685-90.

360

## 361 **Supporting information**

362

363 **S1 Fig. Cluster analysis of isolates from Bangladesh.** The area and year of isolation are shown  
364 in color codes.

365 **S1 Table. *Vibrio cholerae* El Tor strains included in this study with source and year of**  
366 **isolation.**

367

### 368 **Figure captions**

369 **Fig 1. Clonal diversity and geographical distribution of isolates from Bangladesh.**

370 Isolates belonging to clade A were found in all four areas. Clade A contained both clinical and  
371 environmental isolates. In addition to clade A, strains of other clades were found, but only in  
372 Mathbaria.

373

374 **Fig 2. PFGE analysis of the isolates collected from Bangladesh.**

375 A total of 169 strains were analyzed which resulted in 5 clades. Clade A contained 94.67% of the  
376 isolates. The rest 9 isolates which were only found in Mathbaria formed the other 4 groups (B, C,  
377 D and, E).

378

379 **Fig 3. Comparison of band patterns between isolates from Bangladesh and other countries.**

380 The isolates from Bangladesh were compared with 157 additional isolates collected from 13  
381 other countries. The resulting phylogenetic tree represents 16 groups. Clade A contained 89.88%  
382 of the total isolates including 160 isolates of Bangladesh.

383

384 **Fig 4. Global phylogeny of isolates based on PFGE pattern.**

385 Countries are represented by color. 160 isolates of Bangladesh formed clade A, with 133 strains  
386 isolated from other countries. Three subclades were observed in clade A: Subclade Ia and Ib

387 contained strains mostly of African and Asian origin. Subclade II comprised predominantly Latin  
388 American strains. Country subclusters were also observed.

389

390 **Fig 5. Global distribution of clones.**

391

392

393

394

395

396

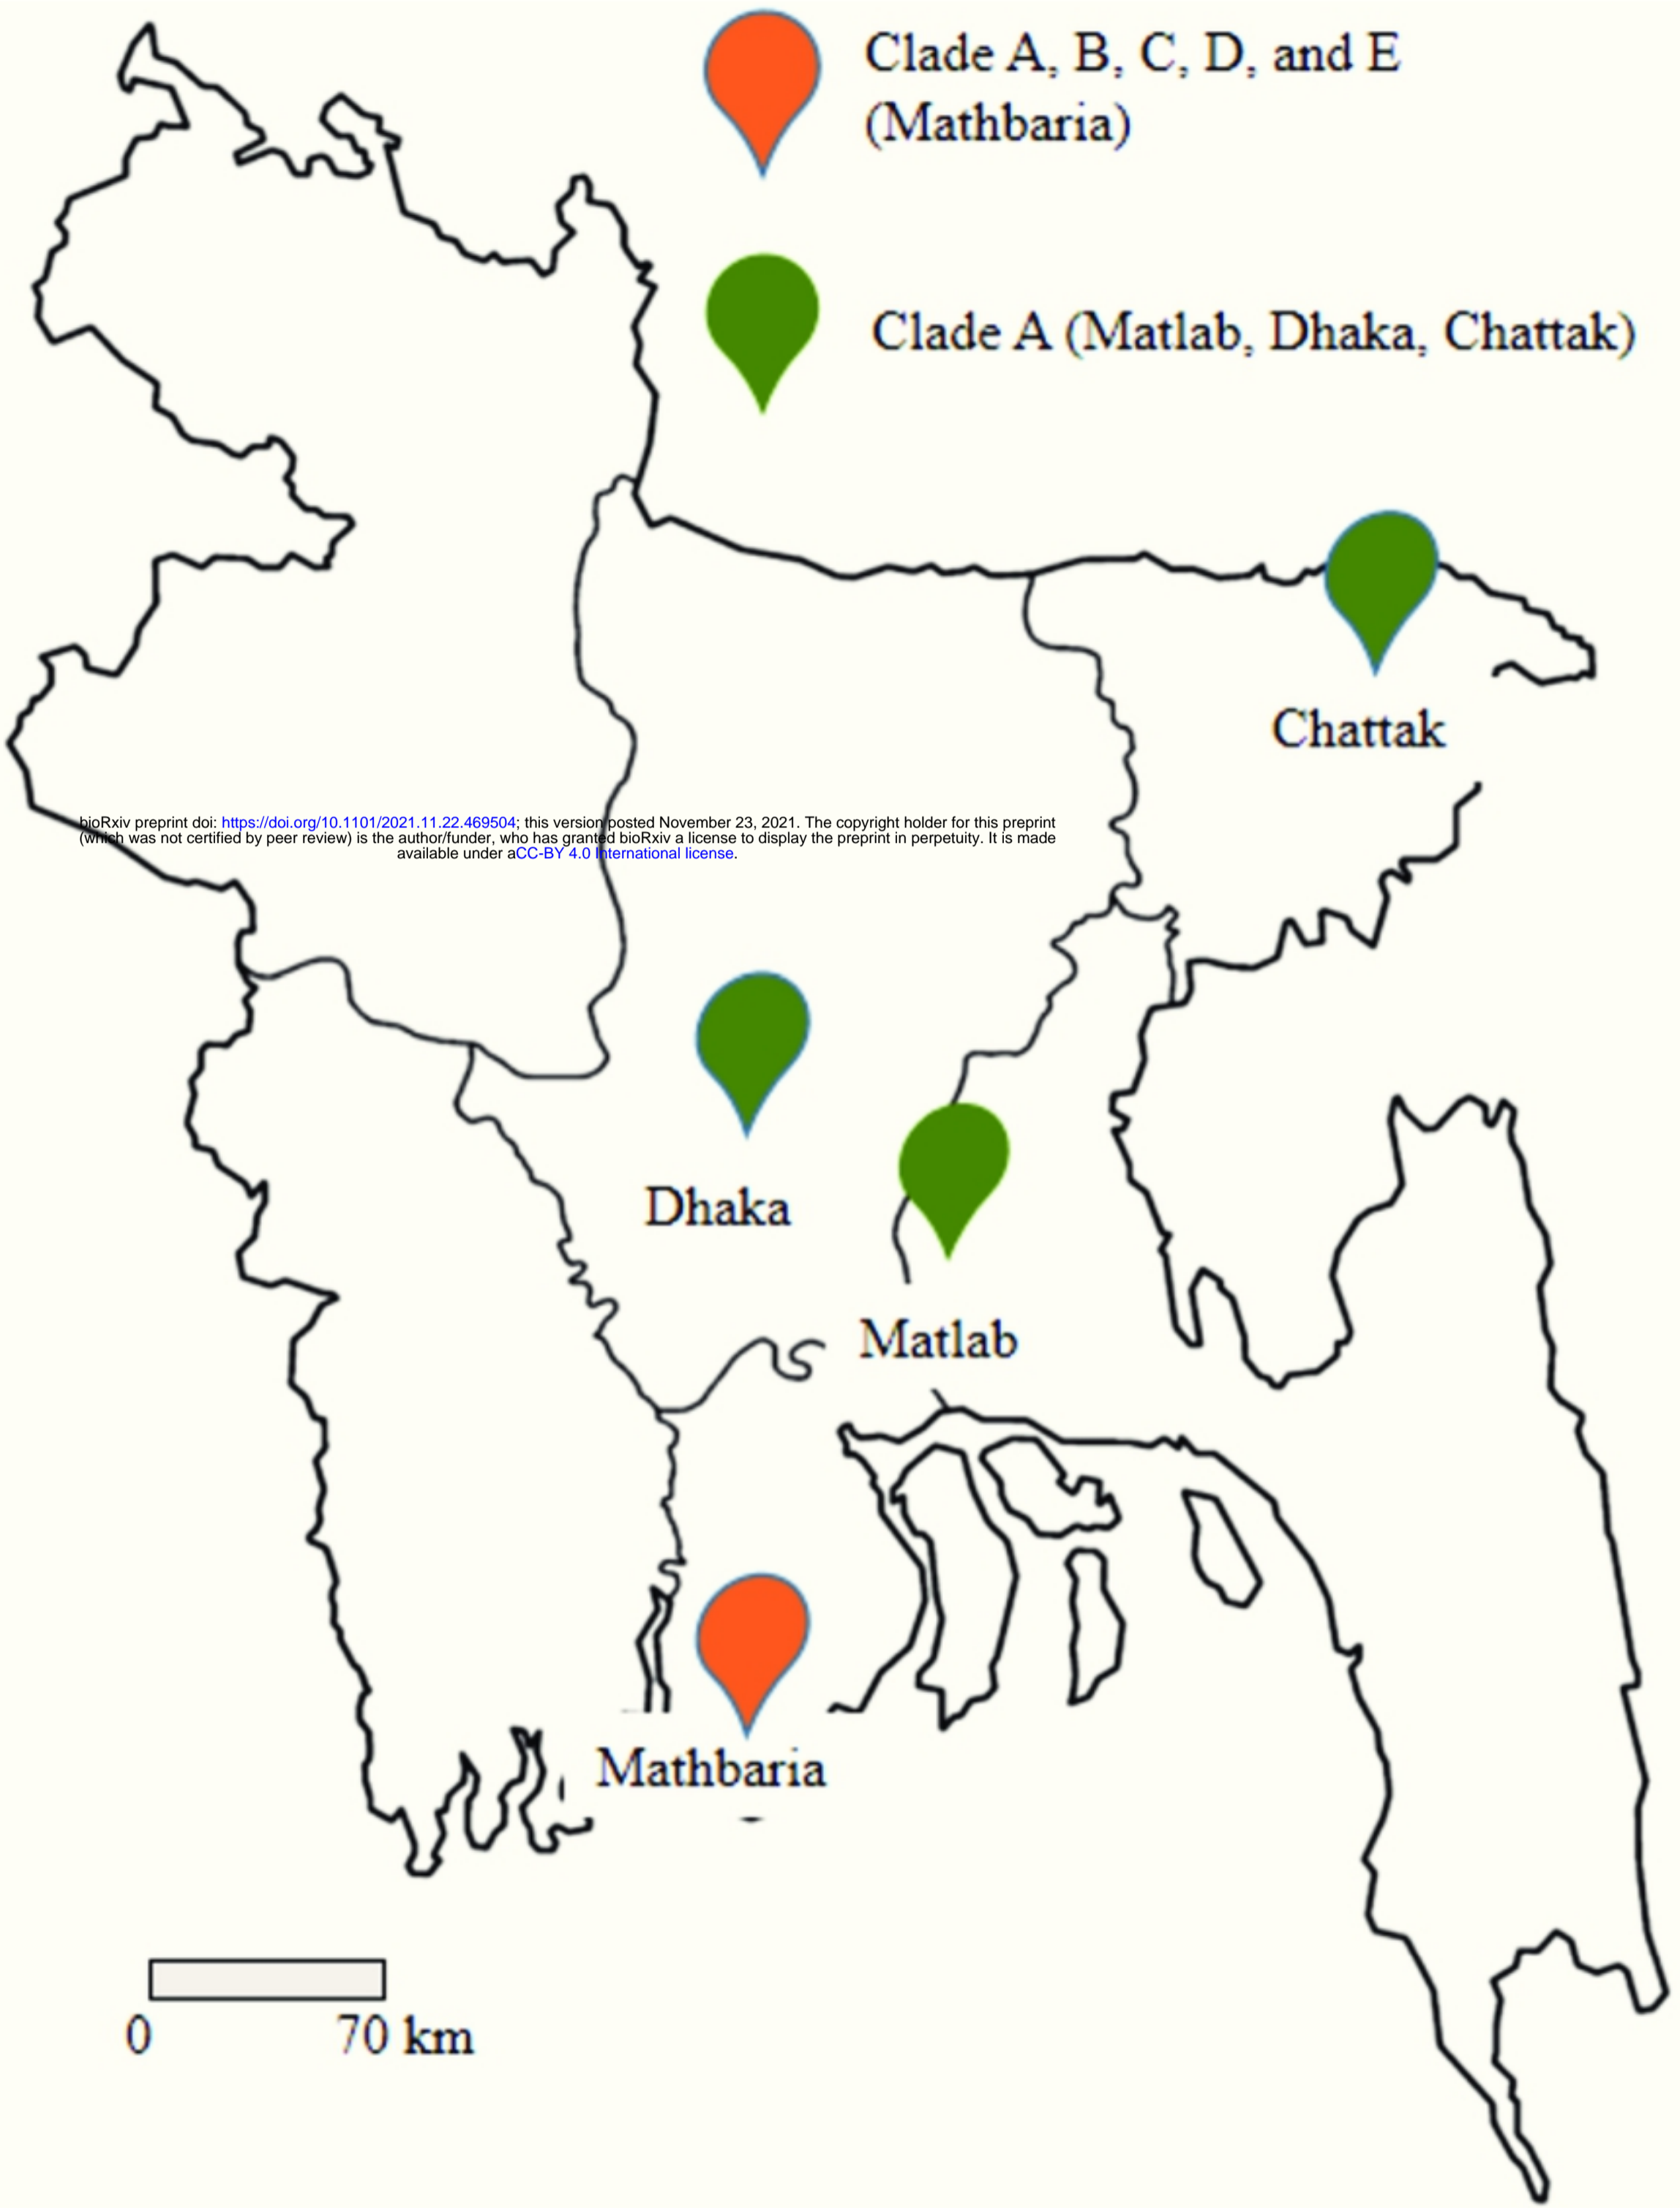

Fig1

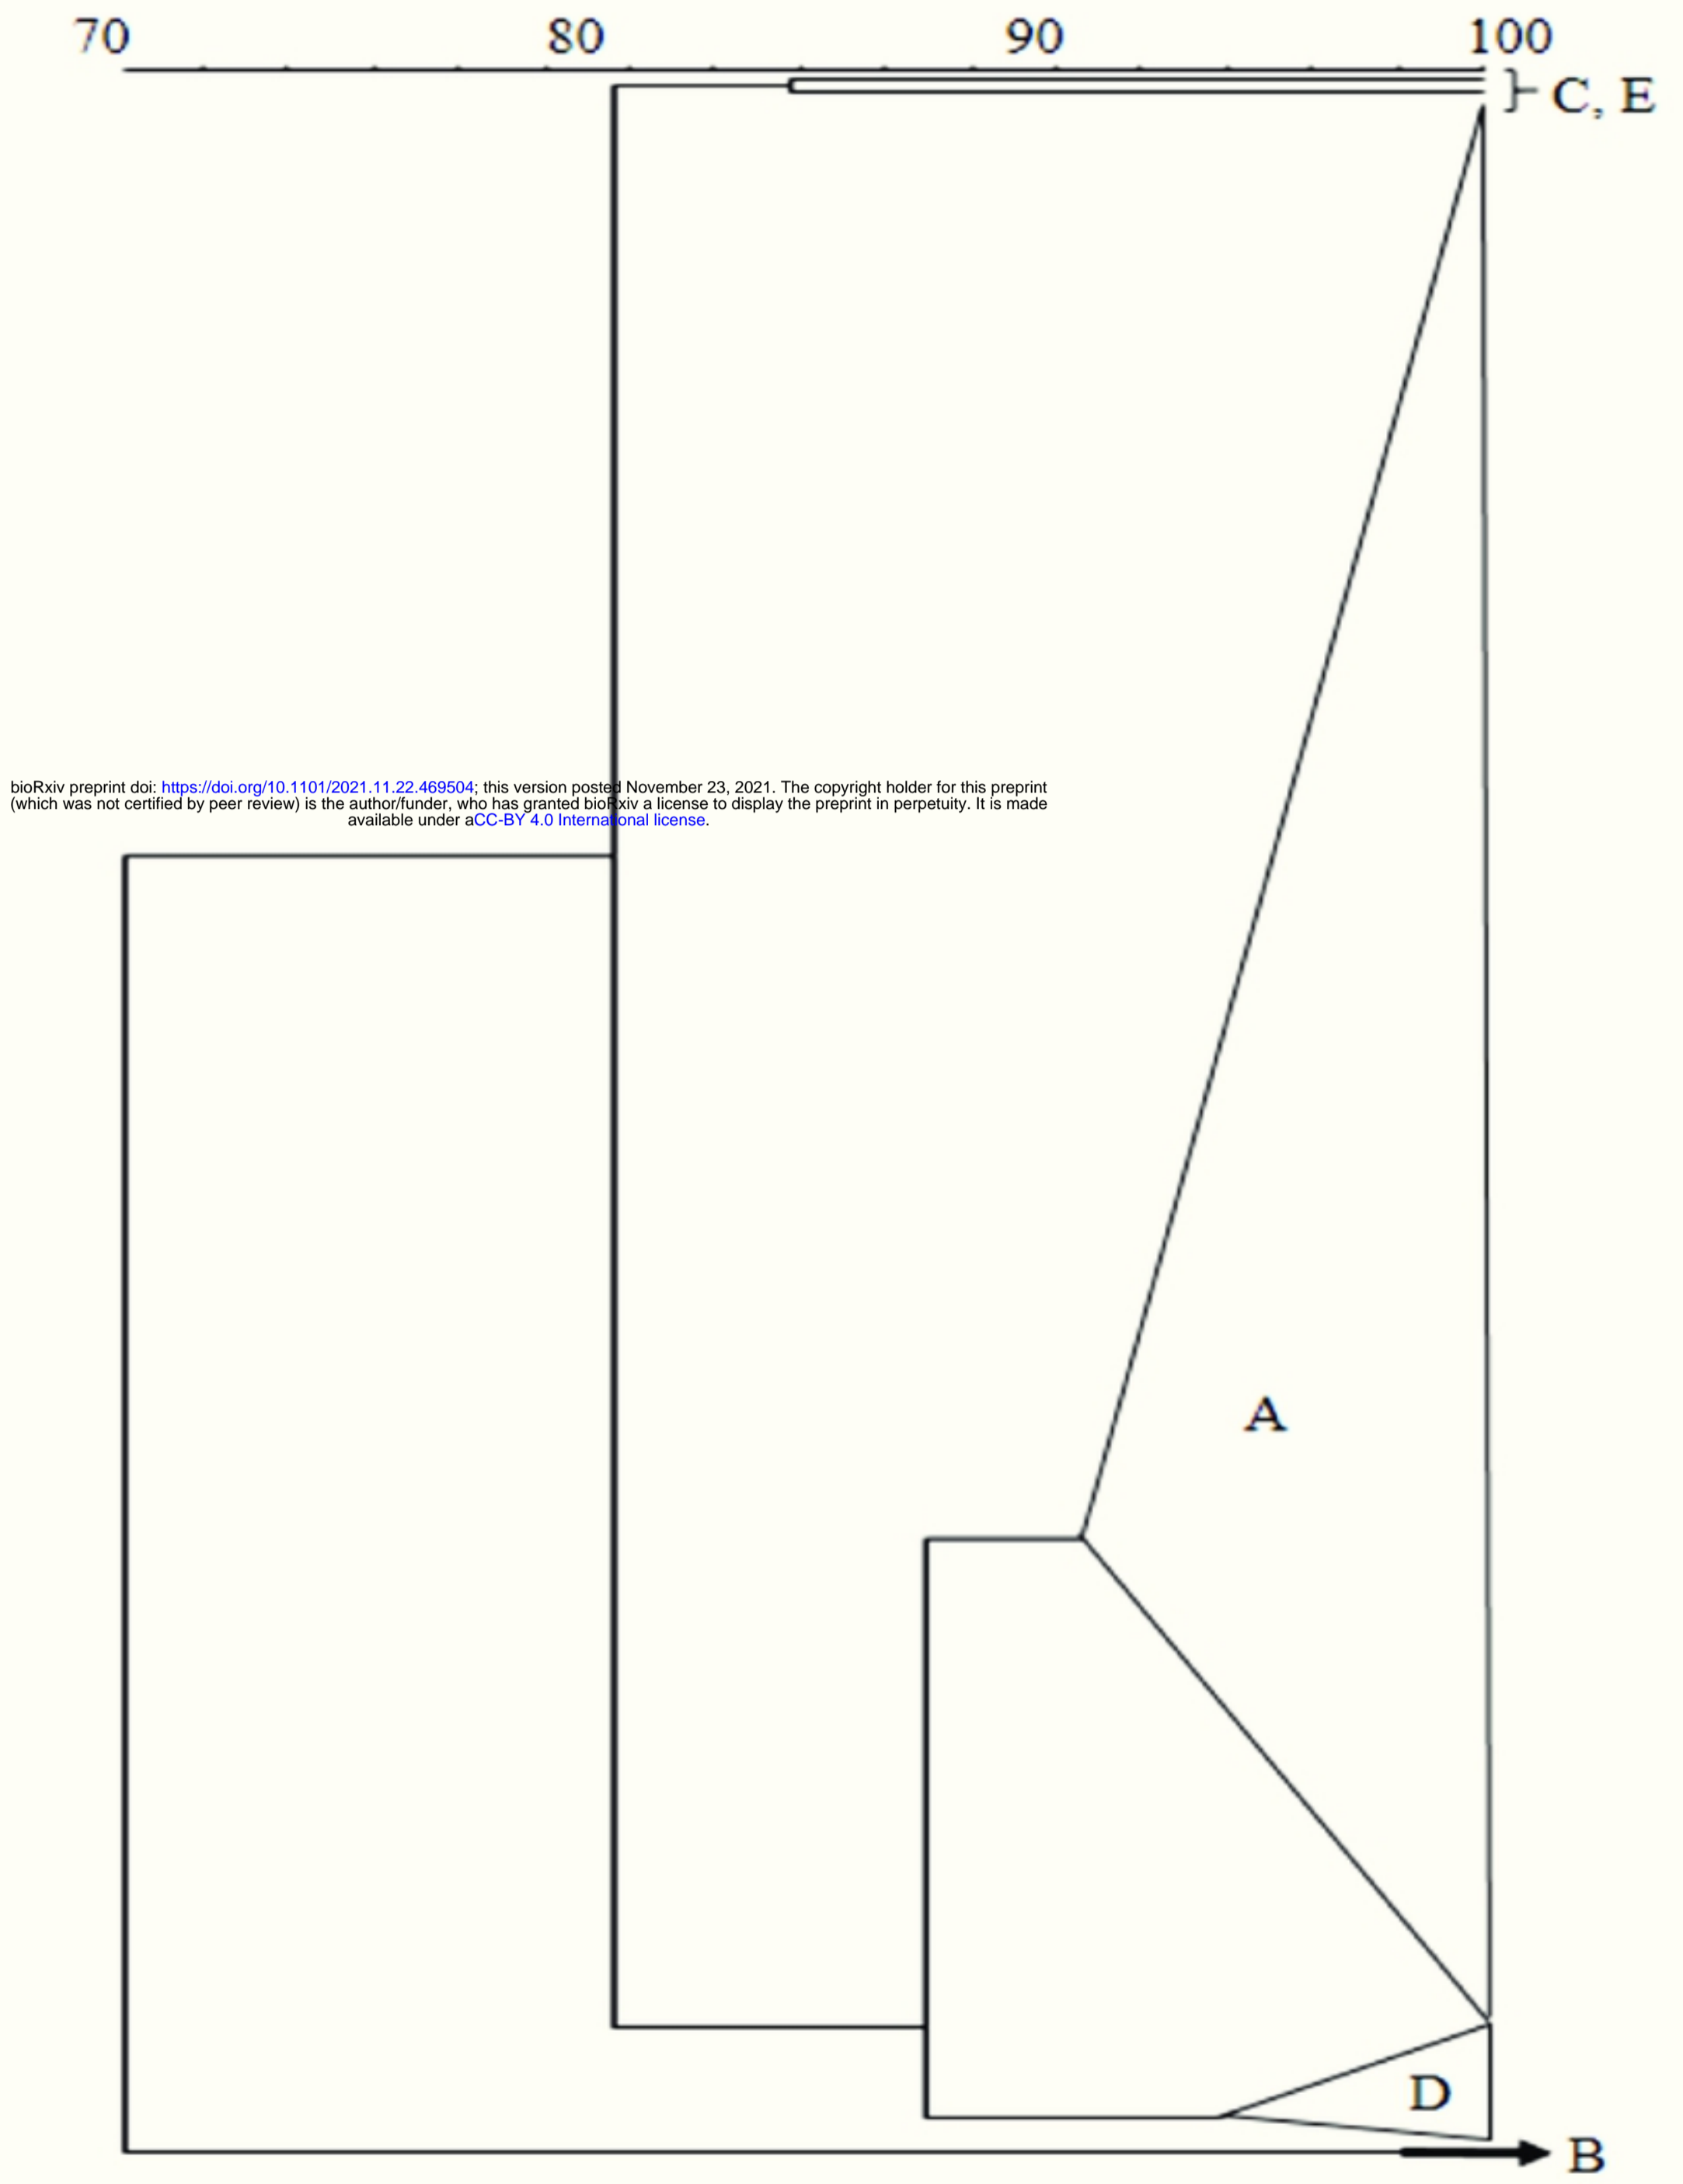

bioRxiv preprint doi: <https://doi.org/10.1101/2021.11.22.469504>; this version posted November 23, 2021. The copyright holder for this preprint (which was not certified by peer review) is the author/funder, who has granted bioRxiv a license to display the preprint in perpetuity. It is made available under aCC-BY 4.0 International license.

Fig2

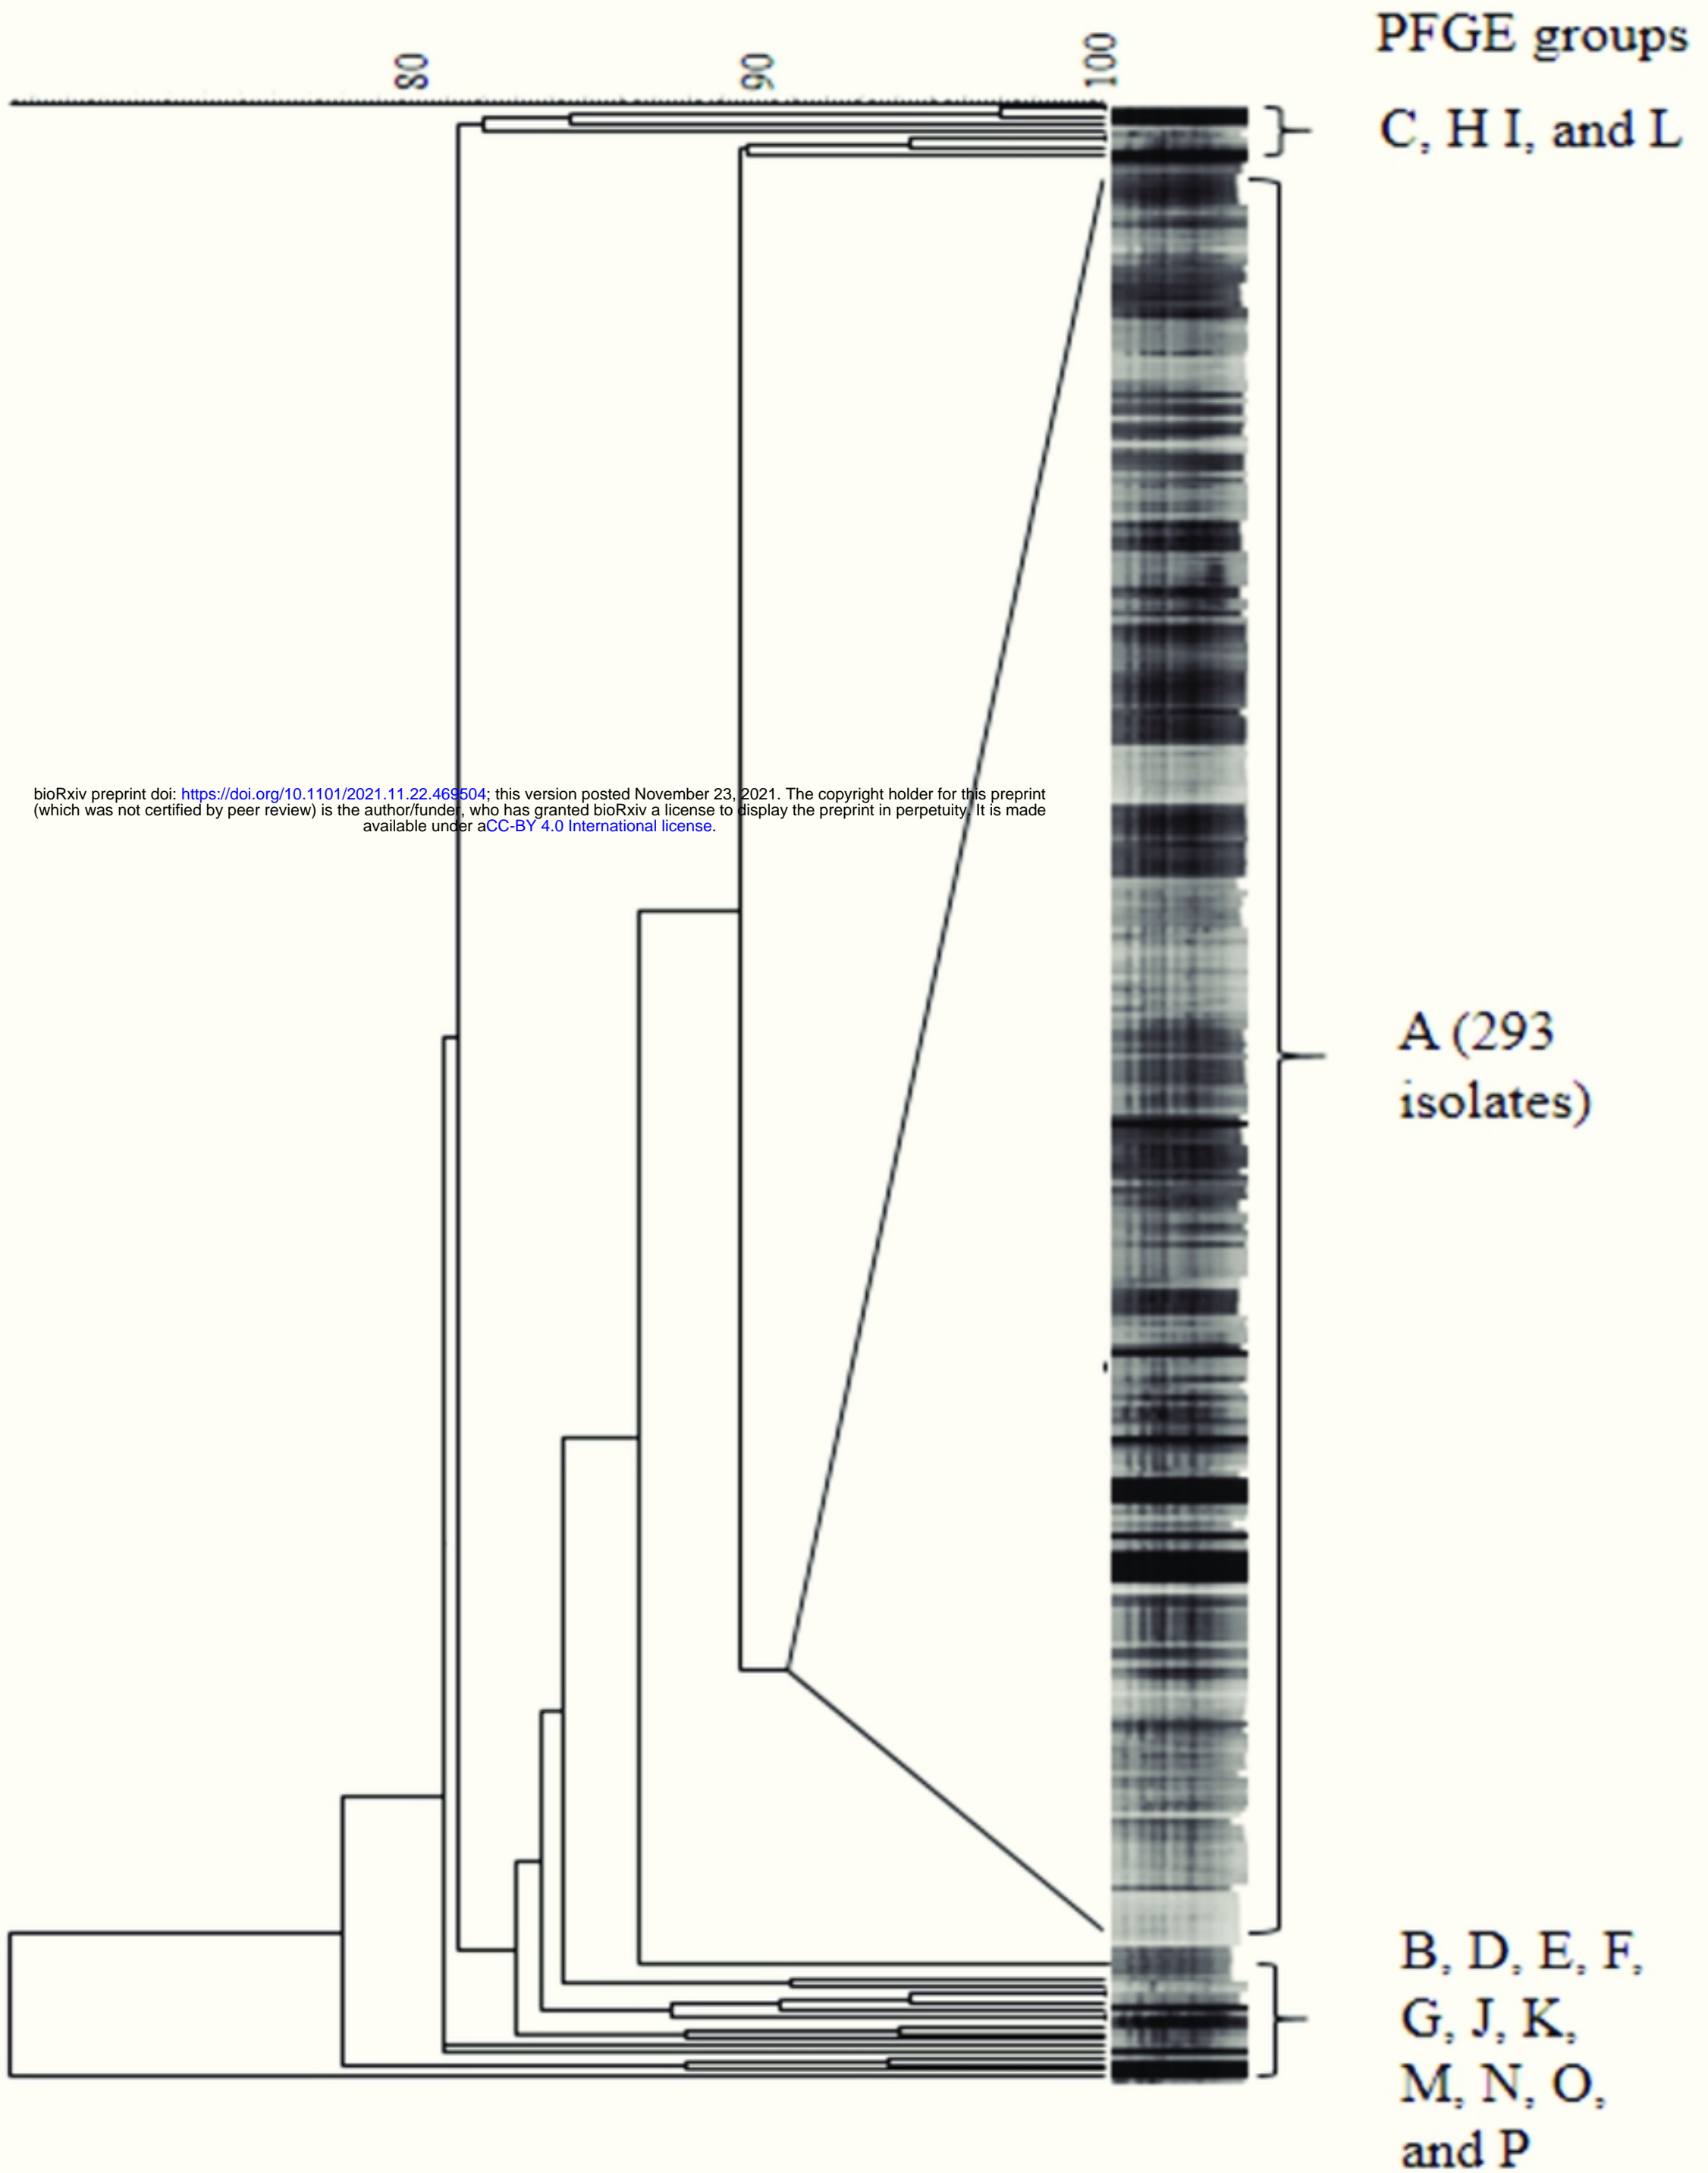

Fig3

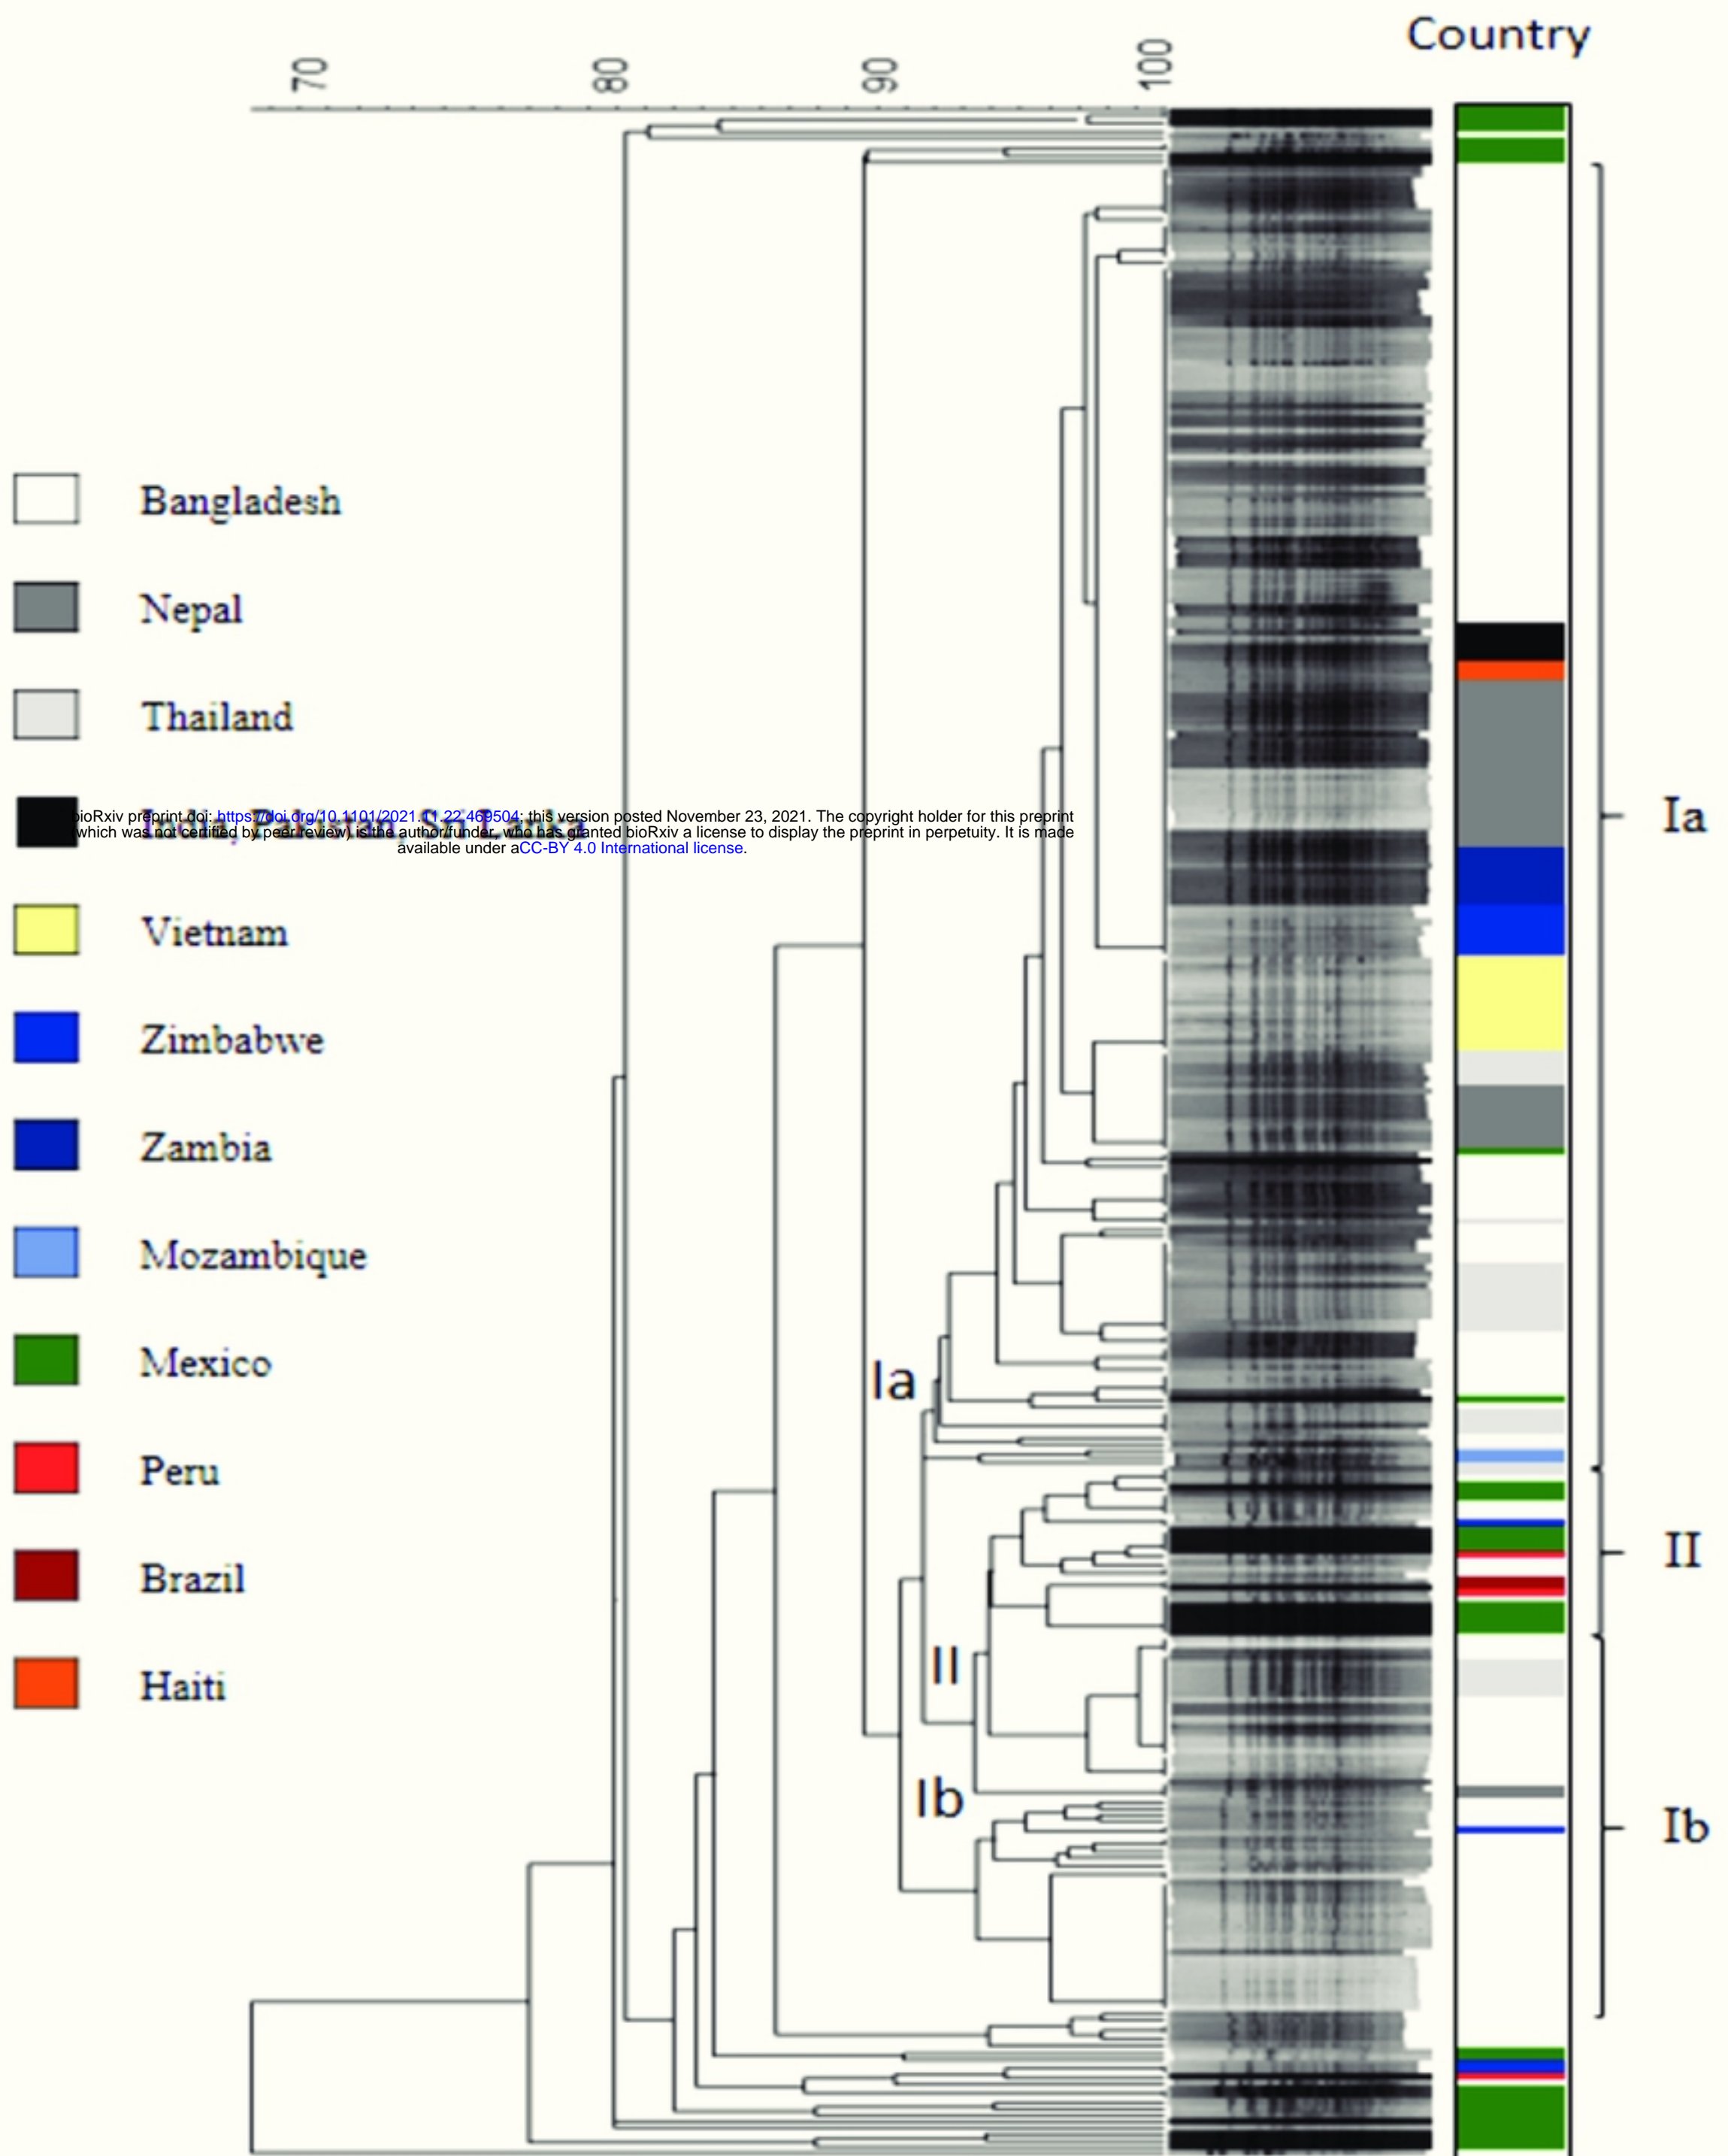

Fig4

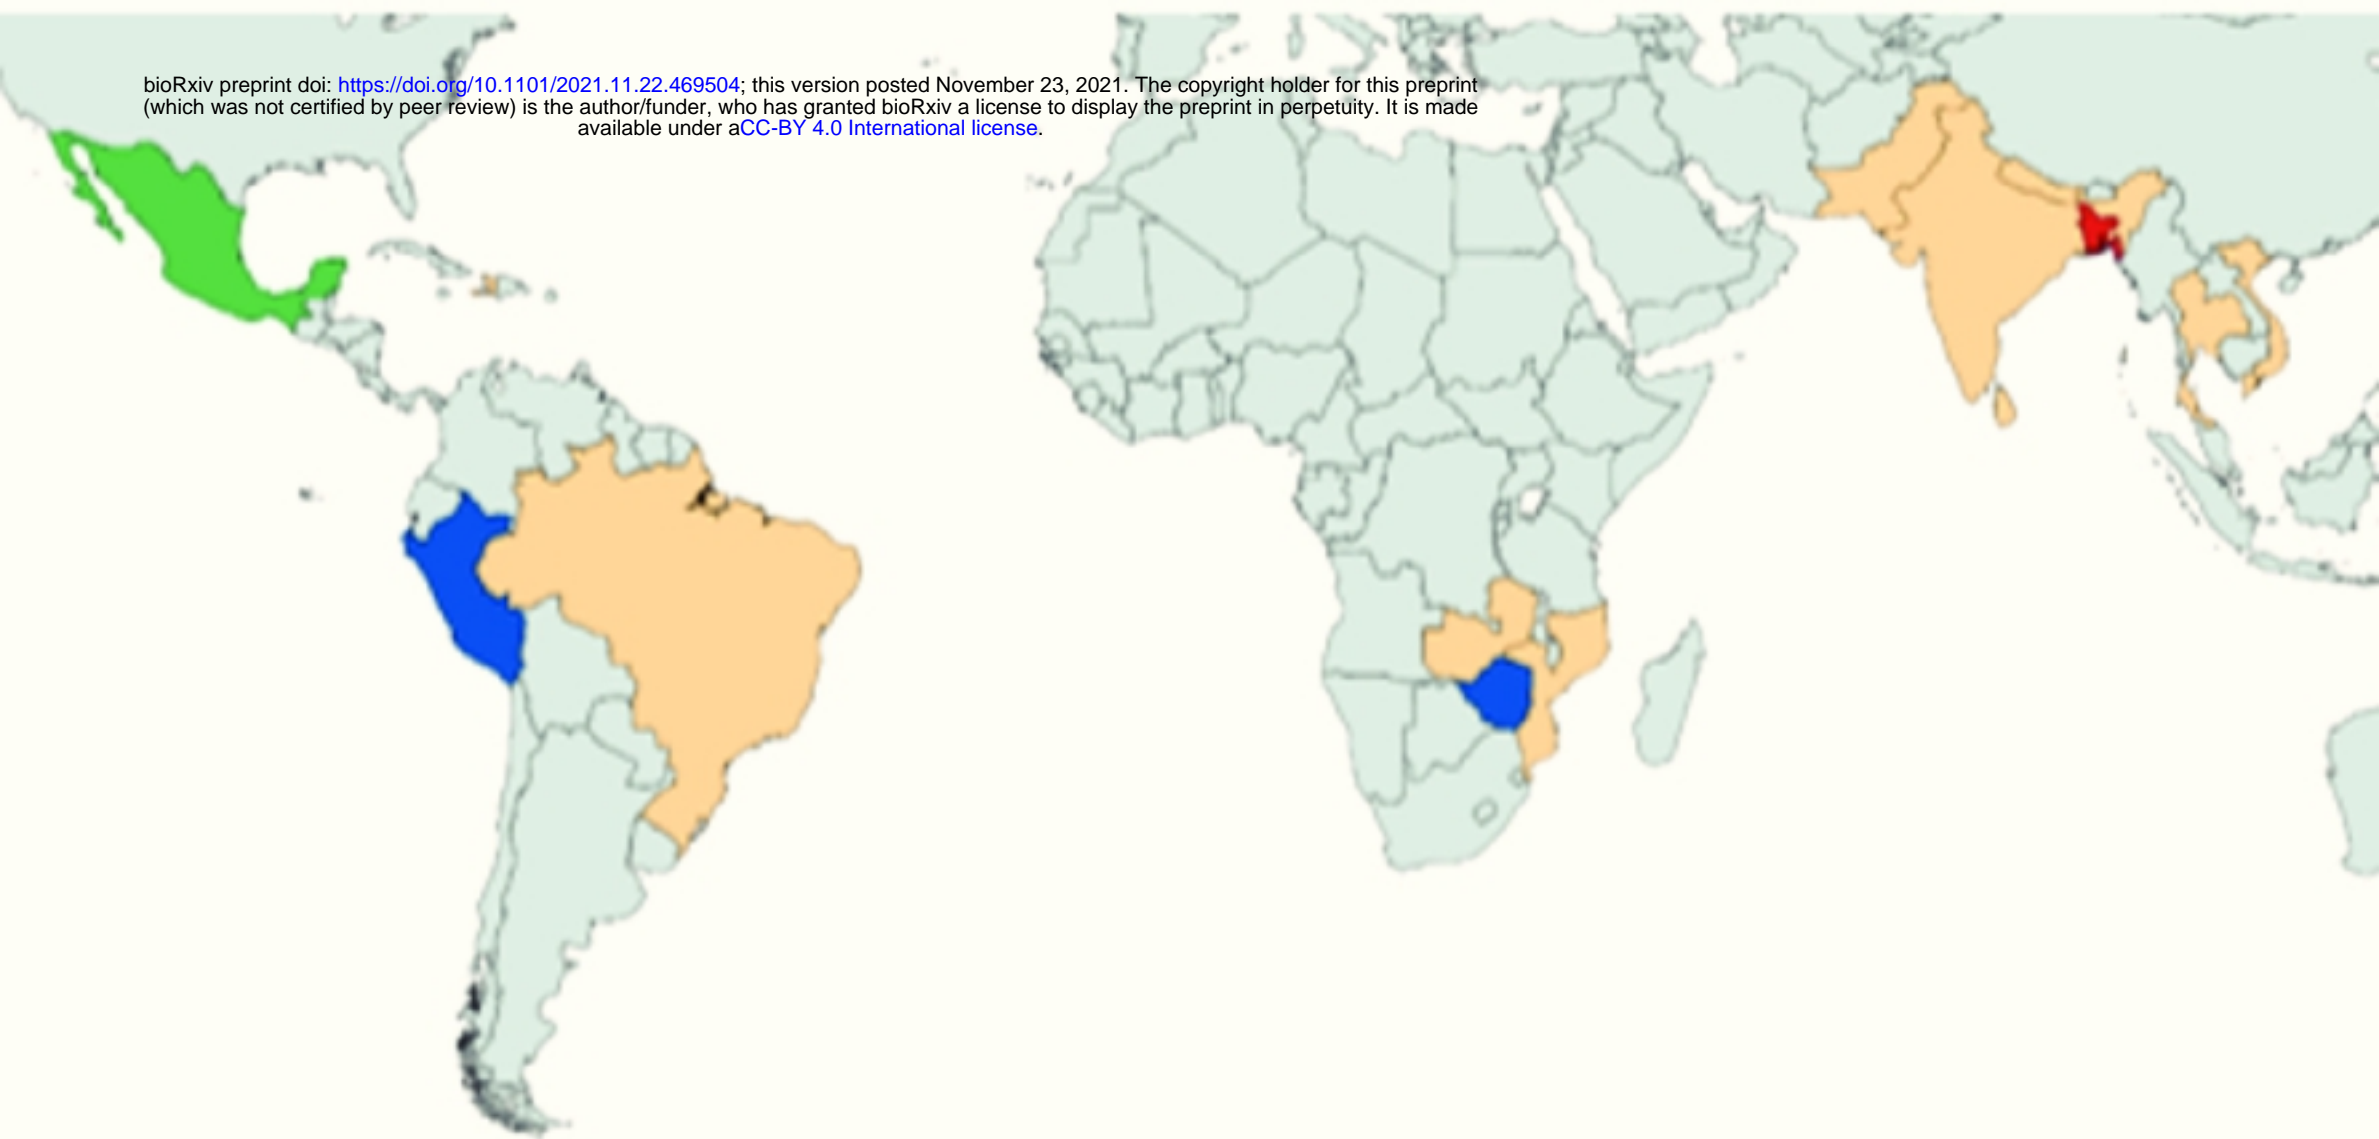

**Clade (country)**

- A-E (Bangladesh)
- A, F-P (Mexico)
- A (India, Pakistan, Sri Lanka, Nepal, Mozambique, Zambia)
- A, E (Peru, Zimbabwe)
